# Supplementary material for: In vitro expansion impaired the stemness of early passage mesenchymal stem cells for treatment of cartilage defects
Source: PubMed Central journal article supplement (PMC5520885; doi:10.1038/cddis.2017.215), 2017-06-01
Supplement: cddis2017215x1.pdf [file cddis2017215x1.pdf]

**Supplemental Table 1. Sequences of primers used in real-time PCR**

| Species | Genes  | Primer sequences (5' →3' )                       | Size (bp)                                    |     |
|---------|--------|--------------------------------------------------|----------------------------------------------|-----|
| Rabbit  | GAPDH  | GTCATCATCTCAGCCCCCTC<br>GGATGCGTTGCTGACAATCT     | 99                                           |     |
|         | COL1A1 | GCGGTGGTTACGACTTTGGTT<br>AGTGAGGAGGGTCTCAATCTG   | 139                                          |     |
|         | COL2A1 | CAGGCAGAGGCAGGAACTAAC<br>CAGAGGTGTTTGACACGGAGTAG | 132                                          |     |
|         | COL10  | ATCAGCCACTGGGAAGCC<br>TTCGGTCCACTTGGTCCTC        | 72                                           |     |
|         | ACAN   | ATGGCTTCCACCAGTGCG<br>CGGATGCCGTAGGTTCTCA        | 127                                          |     |
|         | SOX9   | GTACCCGCACCTGCACAAC<br>TCCGCCTCCTCCACGAAG        | 100                                          |     |
|         | CCNA2  | TGACTTAGCTGCACCAACGG<br>CCCGTACTGTGTAGAGTGC      | 195                                          |     |
|         | MCM6   | CAAGACAGGGACATCGCACT<br>GAGGTCCAGGCATGGTAAGG     | 178                                          |     |
|         | RAD21  | GACTCACCCAGTTCACCCAG<br>CACAACTGGGTTTCGGCAG      | 128                                          |     |
|         | STAG1  | TTGCGAACATCGGGACATCT<br>GCTGAATTGTTGGGCCACAT     | 246                                          |     |
|         | EXO1   | CAGCTTCTTCGTGAGGGGAA<br>TCCCTGAGACCTAGCAGCTT     | 111                                          |     |
|         | human  | GAPDH                                            | CTATAAATTGAGCCCGCAGC<br>GACCAAATCCGTTGACTCCG | 143 |
|         |        | COL1A1                                           | GCTTCACCTACAGCGTCACT<br>AAGCCGAATTCCTGGTCTGG | 154 |
| COL2A1  |        | TGAGCCATGATTCGCCTCG<br>CCCTTTGGTCCTGGTTGCC       | 110                                          |     |
| COL10   |        | CGCTGAACGATACCAAATGCC<br>TTCCCTACAGCTGATGGTCC    | 258                                          |     |
| ACAN    |        | CTACACGCTACACCCTCGAC<br>ACGTCCTCACACCAGGAAAC     | 216                                          |     |
| SOX9    |        | AAGCTCTGGAGACTTCTGAACG<br>CGTTCTTCACCGACTTCCTCC  | 133                                          |     |
| CCNA2   |        | CTGGTGGTCTGTGTTCTGTGA<br>TGCCAGTCTTACTCATAGCTGA  | 137                                          |     |
| MCM6    |        | CCAGTGGTAAAGCGTCCAGT<br>CCACTGATTGGGTTTGCTGC     | 268                                          |     |
| RAD21   |        | GCTGCCGCAAAGTTCTACAG<br>GGTCCAGGTGTTGCGATGAT     | 101                                          |     |
| STAG1   |        | ACAGATGCTGTACACCGTTCA<br>GGCAGGGCATGAAATAAGTGG   | 183                                          |     |

EXO1

AAACCTGAATGTGGCCGTGT  
CCTCATTCCCAAACAGGGACT

---

113

## Supplementary figures

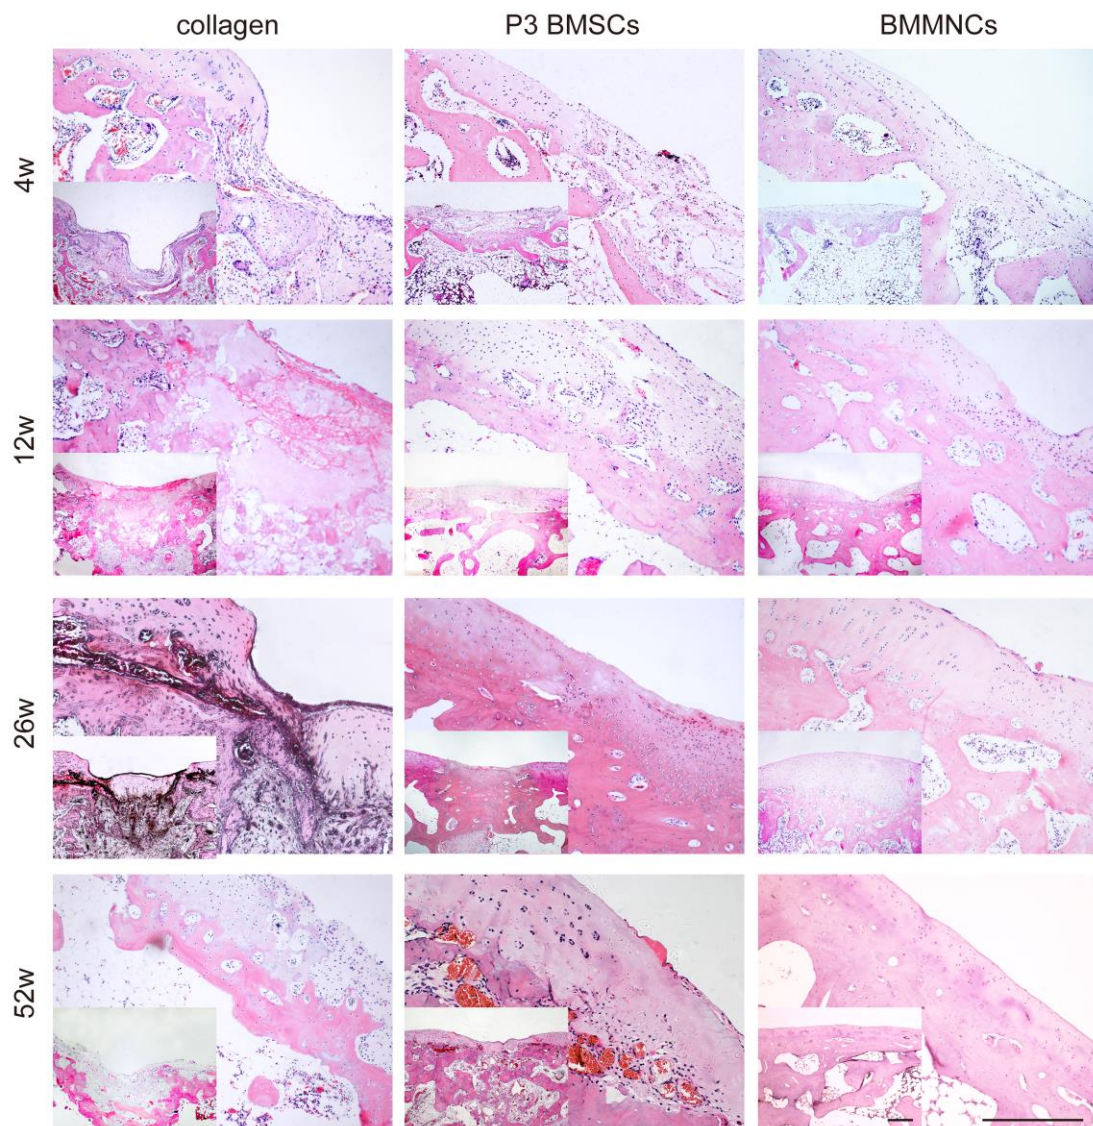

**Figure. S1 HE staining of repaired cartilage *in vivo* at different post-transplantation time, respectively. Scale bar: 400 $\mu$ m.**

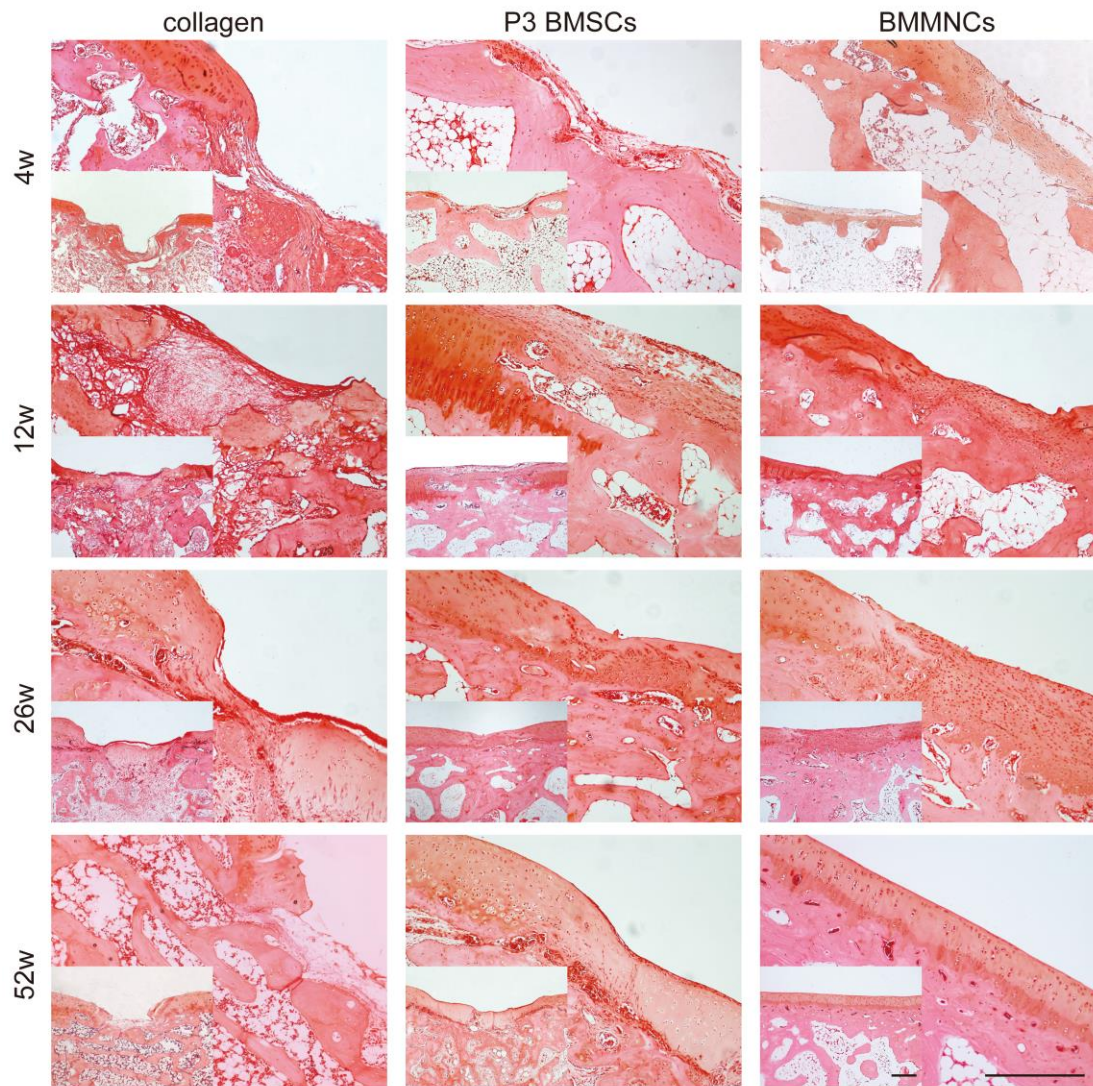

**Figure. S2 Safranin-O staining of repaired cartilage *in vivo* at different post-transplantation time, respectively. Scale bar: 400 $\mu$ m.**
